# Supplementary material for: GPS-ARM: Computational Analysis of the APC/C Recognition Motif by Predicting D-Boxes and KEN-Boxes
Source: PLoS One. 2012 Mar 29;7(3):e34370. doi: 10.1371/journal.pone.0034370 (PMC3315528; doi:10.1371/journal.pone.0034370)
Supplement: Table S1 — We manually collected 74 experimentally identified D-boxes in 68 unique proteins and 44 experimentally identified KEN-boxes in 42 unique proteins from the scientific literature (PubMed). a. UniProt, the UniProt accession numbers of the D-box and KEN-box proteins; b. Position, the position of the D-box or KEN-box; c. Motif type, the type of known motif that the box follows in. d. PMID, the primary references for the known D-boxes or KEN-boxes. (XLS) [file pone.0034370.s003.xls]

## Sheet: Table S1
Table S1 - We manually collected 74 experimentally identified D-boxes in 68 unique proteins and 44 experimentally identified KEN-boxes in 42 unique proteins from the scientific literature (PubMed). a. UniProt, the UniProt accession numbers of the D-box and KEN-box proteins; b. Position, the position of the D-box or KEN-box; c. Motif type, the type of known motif that the box follows in. d. PMID, …
Gene name	UniProta	Positionb	Type	Motif typec	Organism	PMIDd
DNM1L	O00429	473	D-box		H. sapiens	21325626
AURKA	O14965	371	D-box	Motif-D3	H. sapiens	15536123
BUB1	O43683	535	KEN-box		H. sapiens	17158872
BUB1	O43683	625	KEN-box		H. sapiens	17158872
Aurkb	O55099	4	KEN-box		R. norvegicus	15923616;17726374
mad3	O59767	20	KEN-box		S. pombe	18556659
BUB1B	O60566	26	KEN-box		H. sapiens	20016069
GMNN	O75496	23	D-box	Motif-D3	H. sapiens	9635433
BubR1	O76755	7	KEN-box		D. melanogaster	19951912
Invs	O89019	490	D-box	Motif-D2	M. musculus	12471060
GLS	O94925	656	KEN-box		H. sapiens	20921411
PTTG1	O95997	9	KEN-box		H. sapiens	11179223
PTTG1	O95997	61	D-box	Motif-D3	H. sapiens	11179223
E1	P03116	28	KEN-box		B. papillomavirus	14963168
E1	P03116	493	D-box		B. papillomavirus	14963168
TK1	P04183	203	KEN-box		H. sapiens	14701726;17227951
CDC25	P04821	149	D-box	Motif-D2; Motif-D3	S. cerevisiae	7657656
cyclin-B	P07818	42	D-box	Motif-D1; Motif-D3	A. punctulata	8885231
cdca3	P0C2X8	353	KEN-box		X. laevis	12679038
cdc13	P10815	59	D-box	Motif-D1; Motif-D3	S. pombe	8895572
Rrm2	P11157	30	KEN-box		M. musculus	12655059
SKIL	P12757	164	D-box	Motif-D1; Motif-D3	H. sapiens	11691834
ccnb1	P13350	7	D-box	Motif-D2	X. laevis	10733526
ccnb1	P13350	36	D-box	Motif-D1; Motif-D3	X. laevis	10733526
Dnmt1	P13864	647	KEN-box		M. musculus	15899874
CycA	P14785	13	KEN-box		D. melanogaster	11369231;17314514;11350926
ETS2	P15036	20	D-box		H. sapiens	19160489
CCNA2	P20248	47	D-box	Motif-D3	H. sapiens	16123593
CCNA2	P20248	138	D-box	Motif-D3	H. sapiens	16123593
cut2	P21135	33	D-box		S. pombe	9312055
cut2	P21135	52	D-box		S. pombe	9312055
Myf5	P24699	93	D-box	Motif-D3	M. musculus	11073992
Ccnb1	P24860	42	D-box	Motif-D1; Motif-D3	M. musculus	11285280;14593421
CLB2	P24869	25	D-box	Motif-D1; Motif-D3	S. cerevisiae	11719221
CLB2	P24869	100	KEN-box		S. cerevisiae	11719221
CIN8	P27895	932	KEN-box	Motif-KEN	S. cerevisiae	11694576
CLB5	P30283	56	D-box	Motif-D3	S. cerevisiae	10647015;16508019;17620341
CDC25A	P30304	141	KEN-box		H. sapiens	12234927;20606298
CDC25B	P30305	192	KEN-box		H. sapiens	17599046
CDC25C	P30307	151	KEN-box	Motif-KEN	H. sapiens	11842186
DBF4	P32325	62	D-box		S. cerevisiae	10594027
CDC5	P32562	17	D-box		S. cerevisiae	9482731
CDC5	P32562	61	D-box	Motif-D3	S. cerevisiae	9482731
TTK	P33981	256	D-box		H. sapiens	20729194
HSL1	P34244	775	KEN-box		S. cerevisiae	11562348
HSL1	P34244	828	D-box	Motif-D1; Motif-D3	S. cerevisiae	11562348
cig2	P36630	51	D-box	Motif-D1; Motif-D3	S. pombe	11163211
CDKN1A	P38936	86	D-box		H. sapiens	17679094
UME6	P39001	40	D-box		S. cerevisiae	17889668
PDS1	P40316	8	KEN-box		S. cerevisiae	12574115
PDS1	P40316	85	D-box	Motif-D2	S. cerevisiae	8985178
VHL	P40337	60	D-box	Motif-D3	H. sapiens	20802534
mes1	P41005	7	KEN-box	Motif-KEN	S. pombe	18331722
mes1	P41005	34	D-box	Motif-D3	S. pombe	18331722
ID1	P41134	126	D-box	Motif-D3	H. sapiens	18372912
rhp54	P41410	26	KEN-box		S. pombe	18426916
GRIA1	P42261	43	D-box	Motif-D3	H. sapiens	21186356
GRIA1	P42261	126	D-box		H. sapiens	21186356
MAPK9	P45984	203	KEN-box		H. sapiens	20581839
MAD3	P47074	30	KEN-box		S. cerevisiae	17369399;17406666;18556659
MAD3	P47074	429	D-box		S. cerevisiae	17369399
CENPF	P49454	3125	KEN-box		H. sapiens	20053638
NEK2	P51955	361	D-box	Motif-D2	H. sapiens	11742988
NEK2	P51955	391	KEN-box		H. sapiens	10733526;11742988
PLK1	P53350	337	D-box	Motif-D3	H. sapiens	14734534
NRM1	P53718	7	D-box		S. cerevisiae	21562221
DVL1L1	P54792	409	D-box		H. sapiens	19805045
RAC1	P63000	174	D-box		H. sapiens	15143066;15304504
ID2	Q02363	100	D-box	Motif-D3	H. sapiens	16810178
YHP1	Q04116	329	KEN-box		S. cerevisiae	21562221
YHP1	Q04116	340	D-box	Motif-D3	S. cerevisiae	21562221
MCL1	Q07820	207	D-box	Motif-D3	H. sapiens	20526282
FOXM1	Q08050	6	D-box		H. sapiens	18573889;18758239
FOXM1	Q08050	15	D-box		H. sapiens	18573889;18758239
FOXM1	Q08050	207	KEN-box		H. sapiens	18573889;18758239
ACM1	Q08981	98	KEN-box		S. cerevisiae	18596038
ACM1	Q08981	119	D-box	Motif-D3	S. cerevisiae	18596038
CDC20	Q12834	97	KEN-box	Motif-KEN	H. sapiens	10733526;16878123
SKP2	Q13309	3	D-box	Motif-D3	H. sapiens	17283060;18628304
KIF22	Q14807	504	KEN-box		H. sapiens	17726374
ERBB4	Q15303	992	D-box		H. sapiens	17638867
NEUROD2	Q15784	213	D-box		H. sapiens	19900895
ify-1	Q18235	38	D-box	Motif-D1; Motif-D3	C. elegans	12498686
pim	Q24454	7	KEN-box	Motif-KEN	D. melanogaster	12724352
esco2	Q4KLP7	7	KEN-box		X. laevis	21059905
cdca5-a	Q563C3	85	KEN-box		X. laevis	15837422
SGOL1	Q5FBB7	310	KEN-box	Motif-KEN	H. sapiens	19015261
SGOL1	Q5FBB7	457	D-box	Motif-D2	H. sapiens	19015261
AAR100C	Q75EH9	38	D-box	Motif-D3	A. gossypii	17122387
fbxo43	Q8AXF4	529	D-box	Motif-D3	X. laevis	17410129
Gtse1	Q8R080	731	KEN-box		M. musculus	10733526
CKAP2	Q8WWK9	81	KEN-box		H. sapiens	17339342;17376772
aurka	Q91820	378	D-box	Motif-D3	X. laevis	11964384
cort	Q960N3	424	D-box	Motif-D2; Motif-D3	D. melanogaster	18020708
FBXW5	Q969U6	303	D-box	Motif-D3	H. sapiens	21725316
AURKB	Q96GD4	315	D-box	Motif-D3	H. sapiens	16204042
TRIB3	Q96RU7	195	D-box		H. sapiens	20064487
CDC6	Q99741	56	D-box		H. sapiens	10995389
CDC6	Q99741	81	KEN-box		H. sapiens	10995389
FAM64A	Q9BSJ6	53	D-box	Motif-D3	H. sapiens	18757745
NUSAP1	Q9BXS6	384	KEN-box	Motif-KEN	H. sapiens	17618083
Pttg1	Q9CQJ7	58	D-box	Motif-D3	M. musculus	14593421
Ube2c	Q9D1C1	78	D-box		M. musculus	12853486
Ube2c	Q9D1C1	129	D-box	Motif-D3	M. musculus	12853486
P0462H08.5	Q9LGE3	73	D-box	Motif-D3	O. sativa	18701670;20037474
ANLN	Q9NQW6	16	D-box		H. sapiens	16040610
ANLN	Q9NQW6	41	D-box	Motif-D2	H. sapiens	16040610
HOXC10	Q9NYD6	177	D-box		H. sapiens	12853486
HOXC10	Q9NYD6	320	D-box	Motif-D3	H. sapiens	12853486
FBXO5	Q9UKT4	322	D-box	Motif-D3	H. sapiens	16921029
TPX2	Q9ULW0	87	KEN-box		H. sapiens	16287863
FZR1	Q9UM11	7	D-box	Motif-D3	H. sapiens	15029244
FZR1	Q9UM11	28	D-box		H. sapiens	15029244
vih	Q9VTY6	82	D-box		D. melanogaster	15458643
NINL	Q9Y2I6	495	KEN-box		H. sapiens	17403670
NINL	Q9Y2I6	633	D-box	Motif-D2	H. sapiens	17403670
Bub1b	Q9Z1S0	19	KEN-box		M. musculus	19154723
Bub1b	Q9Z1S0	297	KEN-box		M. musculus	19154723
