# Supplementary material for: GPS-ARM: Computational Analysis of the APC/C Recognition Motif by Predicting D-Boxes and KEN-Boxes
Source: PLoS One. 2012 Mar 29;7(3):e34370. doi: 10.1371/journal.pone.0034370 (PMC3315528; doi:10.1371/journal.pone.0034370)
Supplement: Table S3 — The top 15 most enriched biological processes, molecular functions and cellular components of the KEN-box proteins in H. sapiens. (XLS) [file pone.0034370.s005.xls]

## Sheet: Table S3
Table S3 - The top 15 most enriched biological processes, molecular functions and cellular components of the KEN-box proteins in H. sapiens.
Description of GO term	KEN-box		Proteome		E-ratio	p-value
	Num.	Per.	Num.	Per.
The top 15 most enriched biological processes
Cell cycle (GO:0007049)	71	0.0556	416	0.0228	2.44	1.64e-12
Cell division (GO:0051301)	50	0.0392	267	0.0146	2.68	1.2e-10
Mitotic cell cycle (GO:0000278)	54	0.0423	306	0.0167	2.53	2.21e-10
M phase of mitotic cell cycle (GO:0000087)	26	0.0204	93	0.0051	4	5.69e-10
Microtubule-based movement (GO:0007018)	24	0.0188	93	0.0051	3.7	1.48e-08
Flavonoid metabolic process (GO:0009812)	8	0.0063	11	0.0006	10.41	7.55e-08
Mitosis (GO:0007067)	33	0.0259	181	0.0099	2.61	3.22e-07
Golgi to plasma membrane protein transport (GO:0043001)	6	0.0047	7	0.0004	12.27	7.55e-07
Flavone metabolic process (GO:0051552)	5	0.0039	5	0.0003	14.32	1.65e-06
Sulfation (GO:0051923)	6	0.0047	8	0.0004	10.74	2.84e-06
Mitotic prometaphase (GO:0000236)	19	0.0149	85	0.0047	3.2	4.81e-06
Cell adhesion (GO:0007155)	64	0.0502	546	0.0299	1.68	3.08e-05
G2/M transition of mitotic cell cycle (GO:0000086)	20	0.0157	110	0.006	2.6	6.78e-05
Axon guidance (GO:0007411)	40	0.0313	303	0.0166	1.89	7.58e-05
Protein targeting to lysosome (GO:0006622)	5	0.0039	8	0.0004	8.95	7.72e-05
The top 15 most enriched molecular functions
Glucuronosyltransferase activity (GO:0015020)	18	0.0141	23	0.0013	11.21	3.35e-17
ATP binding (GO:0005524)	184	0.1442	1501	0.0821	1.76	9.41e-15
Nucleotide binding (GO:0000166)	215	0.1685	2002	0.1096	1.54	3.03e-11
Retinoic acid binding (GO:0001972)	12	0.0094	18	0.001	9.55	1.6e-10
Microtubule motor activity (GO:0003777)	23	0.018	72	0.0039	4.57	3e-10
Protein binding (GO:0005515)	389	0.3049	4250	0.2326	1.31	4.5e-10
Actin binding (GO:0003779)	49	0.0384	289	0.0158	2.43	5.96e-09
Motor activity (GO:0003774)	16	0.0125	54	0.003	4.24	4.86e-07
Nucleic acid binding (GO:0003676)	48	0.0376	331	0.0181	2.08	1.11e-06
Aryl sulfotransferase activity (GO:0004062)	5	0.0039	5	0.0003	14.32	1.65e-06
Nucleoside-triphosphatase activity (GO:0017111)	14	0.011	57	0.0031	3.52	2.73e-05
Helicase activity (GO:0004386)	21	0.0165	117	0.0064	2.57	5.48e-05
Y-form DNA binding (GO:0000403)	4	0.0031	5	0.0003	11.46	0.000112
Flavonol 3-sulfotransferase activity (GO:0047894)	3	0.0024	3	0.0002	14.32	0.00034
JUN kinase activity (GO:0004705)	3	0.0024	3	0.0002	14.32	0.00034
The top 15 most enriched cellular components
Cytoskeleton (GO:0005856)	130	0.1019	801	0.0438	2.32	4.2e-20
Cytoplasm (GO:0005737)	467	0.366	5072	0.2776	1.32	6.24e-13
Viral capsid (GO:0019028)	12	0.0094	14	0.0008	12.27	1.02e-12
Centrosome (GO:0005813)	54	0.0423	283	0.0155	2.73	1.02e-11
Nucleus (GO:0005634)	480	0.3762	5331	0.2917	1.29	1.05e-11
Microtubule (GO:0005874)	50	0.0392	254	0.0139	2.82	1.83e-11
Spindle (GO:0005819)	28	0.0219	99	0.0054	4.05	9.23e-11
Integral to membrane (GO:0016021)	223	0.1748	4340	0.2375	0.74	1.09e-08
Extracellular region (GO:0005576)	89	0.0697	2082	0.1139	0.61	3.05e-08
Spindle pole (GO:0000922)	19	0.0149	70	0.0038	3.89	1.96e-07
Cytosol (GO:0005829)	200	0.1567	2130	0.1166	1.34	4.98e-06
Chromosome (GO:0005694)	39	0.0306	264	0.0144	2.12	7.06e-06
Membrane (GO:0016020)	202	0.1583	3728	0.204	0.78	9.44e-06
Cilium axoneme (GO:0035085)	13	0.0102	46	0.0025	4.05	1.02e-05
Condensed chromosome kinetochore (GO:0000777)	15	0.0118	61	0.0033	3.52	1.4e-05
